# Supplementary material for: Resequencing and assembly of seven complex loci to improve the Leishmania major (Friedlin strain) reference genome
Source: PubMed Central journal article supplement (PMC4746890; doi:10.1186/s13071-016-1329-4), 2016-02-08
Supplement: 13071_2016_1329_MOESM1_ESM.pdf [file 13071_2016_1329_MOESM1_ESM.pdf]

## Material supplementary 1

**Table 1.** Oligonucleotides used for amplification and sequencing of the cloned PCR products

| Name (Lab code)       | Genomic locus (Figure) | Sequence 5' to 3'     | Purpose and PCR conditions*                                                |
|-----------------------|------------------------|-----------------------|----------------------------------------------------------------------------|
| 12150_sara_F1 (537)   | LmjF.15.1480 (Fig. 1)  | GTCTCGAACAGCTCCTCGTC  | PCR amplification (fragment 1), +12150_sara_R1; D-PCR; annealing: 61.3°C   |
| 12150_sara_R1 (536)   | LmjF.15.1480 (Fig. 1)  | ATAGAGGCCTGTGACAGGGC  | See 12150_sara_F1 (537)                                                    |
| 12150_sara_F2 (540)   | LmjF.15.1480 (Fig. 1)  | ATGGTGGCGACAATTTGG    | Sequencing                                                                 |
| 12150_sara_R2 (541)   | LmjF.15.1480 (Fig. 1)  | ACCACCCCTCGCTCCTG     | Sequencing                                                                 |
| 12150_sara_R3 (546)   | LmjF.15.1480 (Fig. 1)  | ATCCGATCCTCGATTGTTTAA | Sequencing                                                                 |
| 12150_sara_F4 (589)   | LmjF.15.1480 (Fig. 1)  | AGGAGAGGGGAGTTACAGCA  | Sequencing                                                                 |
| 12150_sRvs (590)      | LmjF.15.1480 (Fig. 1)  | GGTTTCCTGTCTTTGCATCC  | Sequencing                                                                 |
| 12150_albaP1_F1 (591) | LmjF.15.1480 (Fig. 1)  | CATCCATGACACAAGCGTTC  | PCR amplification (fragment 2), +12150_albaP1_R1; M-PCR; annealing: 57.2°C |
| 12150_albaP1_R1 (592) | LmjF.15.1480 (Fig. 1)  | GCTGATCAACAAGCTGGACA  | See 12150_albaP1_F1 (591)                                                  |
| 12150_albaP1_F2 (621) | LmjF.15.1480 (Fig. 1)  | GGTCGGACAGAATCTCGATGG | Sequencing                                                                 |
| 12150_albaP2_F1 (593) | LmjF.15.1480 (Fig. 1)  | GCTCACCGCTTTCACTTCTC  | PCR amplification (fragment 3), +12150_albaP2_R1; M-PCR; annealing: 54.3°C |
| 12150_albaP2_R1 (594) | LmjF.15.1480 (Fig. 1)  | TGTTTTTCGGCTCGTATTGG  | See 12150_albaP2_F1 (593)                                                  |
| 12150c2-F2 (625)      | LmjF.15.1480 (Fig. 1)  | GCGGCACTGCAAGATGAAG   | Sequencing                                                                 |
| 12150c2-R2 (626)      | LmjF.15.1480 (Fig. 1)  | CGGTGTAGCATCTTCCTGGT  | Sequencing                                                                 |
| 12155_F1 (548)        | LmjF.15.0280 (Fig. 2)  | TACGTGACCCCACTCACAAA  | PCR amplification (fragment 1), +12155_R1; D-PCR; annealing: 57.2°C        |
| 12155_R1 (549)        | LmjF.15.0280 (Fig. 2)  | TACGAGCTGCCACAAAAGTG  | See 12155_F1 (548)                                                         |
| 12155_F2 (568)        | LmjF.15.0280 (Fig. 2)  | TTGGTAAGCAGCAGATGAGG  | Sequencing                                                                 |
| 12155_R2 (608)        | LmjF.15.0280 (Fig. 2)  | CTGTCGAAGGGCCAGCTT    | Sequencing                                                                 |
| 12155_F3 (609)        | LmjF.15.0280 (Fig. 2)  | CGAAAGGGAAAGGGAGGAC   | Sequencing                                                                 |
| 12141_F1 (556)        | LmjF.24.0770 (Fig. 3)  | GACGTCAGCCTTCTGTGAAG  | PCR amplification (fragment 2), +12141_R1; D-PCR; annealing: 58.7°C        |

|                    |                            |                        |                                                                     |
|--------------------|----------------------------|------------------------|---------------------------------------------------------------------|
| 12141_R1 (551)     | LmjF.24.0770 (Fig. 3)      | GTTCGTGCGTTGTTCTGTACAT | See 12141_F1 (556)                                                  |
| 12141_F2 (550)     | LmjF.24.0770 (Fig. 3)      | GCATGCCTTGTAGACCCTTC   | PCR amplification (fragment 1), +12141_R2; D-PCR; annealing: 59.3°C |
| 12141_R2 (567)     | LmjF.24.0770 (Fig. 3)      | GATACTGCACGCAACCATGC   | See 12141_F2 (550)                                                  |
| 12141_F3 (595)     | LmjF.24.0770 (Fig. 3)      | TTGTCAAAACTGCGTGTGTG   | Sequencing                                                          |
| 12141_F4 (596)     | LmjF.24.0770 (Fig. 3)      | CGCTTTTCATTTTGGCTGTT   | Sequencing                                                          |
| 12141_R4 (597)     | LmjF.24.0770 (Fig. 3)      | GATGTTTTGGTGGCTGTGC    | Sequencing                                                          |
| 12141_R5 (620)     | LmjF.24.0770 (Fig. 3)      | GCGACGTACAGGGAGCACTTG  | Sequencing                                                          |
| 12141_R6 (630)     | LmjF.24.0770 (Fig. 3)      | CCATAGCAGGAAAGAGAG     | Sequencing                                                          |
| 12141_P1R (607)    | LmjF.24.0770 (Fig. 3)      | CGGGAAGACGTACAGGTTG    | Sequencing                                                          |
| 12142_F1 (557)     | LmjF.14.0850 (Fig. 4)      | ATGTCCGTAGCTGCCTCAG    | PCR amplification (fragment 1), +12142_R1; D-PCR; annealing: 61.3°C |
| 12142_R1 (568)     | LmjF.14.0850 (Fig. 4)      | TCGGTTCTTTGCCGCTGAGG   | See 12142_F1 (557)                                                  |
| Cg12142-FM-S (577) | LmjF.14.0850 (Fig. 4)      | CCGCTCTCACGCATGGATC    | Sequencing                                                          |
| 12142_R2 (579)     | LmjF.14.0850 (Fig. 4)      | GTCTAACCCCTCTCTCC      | Sequencing                                                          |
| 12142_F3 (598)     | LmjF.14.0850 (Fig. 4)      | TGAACCGTGTAACAGTTGTGC  | Sequencing                                                          |
| 12142_R3 (599)     | LmjF.14.0850 (Fig. 4)      | GCACCGCAAGCATACATAGAC  | Sequencing                                                          |
| 12142_F5 (569)     | LmjF.14.0850 (Fig. 4)      | CTCTCTACTCTTTAGACTTC   | PCR amplification (fragment 2), +12142_R5; D-PCR; annealing: 58.7°C |
| 12142_R5 (558)     | LmjF.14.0850 (Fig. 4)      | TCACTCTACCAGCGACATCC   | See 12142_F5 (569)                                                  |
| 12142_F6 (600)     | LmjF.14.0850 (Fig. 4)      | CACGCTCCAAGATCAGAAGA   | Sequencing                                                          |
| 12142_R6 (601)     | LmjF.14.0850 (Fig. 4)      | ACGGCTTCAAGATCAGCTTC   | Sequencing                                                          |
| 12153_F1 (561)     | LmjF.19.0300-0310 (Fig. 5) | CCTCGTCCAAGGACTGTTGT   | PCR amplification (fragment 1), +12153_R1; D-PCR; annealing: 59.3°C |
| 12153_R1 (562)     | LmjF.19.0300-0310 (Fig. 5) | GTCCCTCACTTGCTGTCCAT   | See 12153_F1 (561)                                                  |
| 12153_F2 (563)     | LmjF.19.0300-0310 (Fig. 5) | GGTCGATCAGAGCAGTGACA   | PCR amplification (fragment 3), +12153_R2; D-PCR; annealing: 58.5°C |
| 12153_R2 (564)     | LmjF.19.0300-0310 (Fig. 5) | CCATCAACAACGCTGAGGAAA  | See 12153_F2 (563)                                                  |

|                   |                            |                        |                                                                       |
|-------------------|----------------------------|------------------------|-----------------------------------------------------------------------|
| 12153_F3 (565)    | LmjF.19.0300-0310 (Fig. 5) | GACTGCTGTTGGTGGGCCTT   | PCR amplification (fragment 2), +12153_R3; D-PCR; annealing: 61.2°C   |
| 12153_R3 (566)    | LmjF.19.0300-0310 (Fig. 5) | CAGTCGCTAAGGTAGCGGC    | See 12153_F3 (565)                                                    |
| 12153_F4 (610)    | LmjF.19.0300-0310 (Fig. 5) | GTGAAATGGACGGAAATGGA   | Sequencing                                                            |
| 12153_R4 (611)    | LmjF.19.0300-0310 (Fig. 5) | CTTCCTCGTCCCCTTCTCC    | Sequencing                                                            |
| 12153_F5 (612)    | LmjF.19.0300-0310 (Fig. 5) | GGTGTGTGTCGACGTTAATGG  | Sequencing                                                            |
| 12153_R5 (613)    | LmjF.19.0300-0310 (Fig. 5) | TTGATCCGAGAGGGTTGC     | Sequencing                                                            |
| 12153_F6 (614)    | LmjF.19.0300-0310 (Fig. 5) | CGACAGGAGTGCAAGAAGGG   | Sequencing                                                            |
| 12153_R7 (624)    | LmjF.19.0300-0310 (Fig. 5) | GTGCACCCGAGTCGTGG      | Sequencing                                                            |
| Cg12145-R (560)   | LmjF.36.5970-5980 (Fig. 6) | CTTCCTGGGAGAGACGACAG   | PCR amplification (fragment 2), + Cg12145-I; D-PCR; annealing: 60.3°C |
| Cg12145-M (574)   | LmjF.36.5970-5980 (Fig. 6) | CTTCGTCGACGAGTTCATGCG  | See Cg12145-NF (582)                                                  |
| Cg12145-I (575)   | LmjF.36.5970-5980 (Fig. 6) | GGTCAGTGAAAGCGAAGGAG   | See Cg12145-R (560)                                                   |
| Cg12145-IRS (581) | LmjF.36.5970-5980 (Fig. 6) | GACGAGATTGGTTTACCGC    | Sequencing                                                            |
| Cg12145-NF (582)  | LmjF.36.5970-5980 (Fig. 6) | CAACCTCCAGTTGCGCTTGC   | PCR amplification (fragment 1), + Cg12145-M; D-PCR; annealing: 61.5°C |
| 12130_F1 (552)    | LmjF.27.2030 (Fig. 7)      | TCAAGCCTCGACCTTCACTG   | PCR amplification (fragment 1), + 12130_R1; M-PCR; annealing: 58.5°C  |
| 12130_R1 (553)    | LmjF.27.2030 (Fig. 7)      | GCTACTTCACTCCATCGTTTC  | See 12130_F1 (552)                                                    |
| 12130_F2 (583)    | LmjF.27.2030 (Fig. 7)      | GTAATCCTTCTCCGTCCTC    | Sequencing                                                            |
| 12130_F3 (584)    | LmjF.27.2030 (Fig. 7)      | GAAATGCACGTCTTCGTGG    | Sequencing                                                            |
| 12130_R4 (585)    | LmjF.27.2030 (Fig. 7)      | CGAAGAAGAACGGGACAG     | Sequencing                                                            |
| 12130_F5 (554)    | LmjF.27.2030 (Fig. 7)      | GAAGTTACAGCATCGCTTCATC | PCR amplification (fragment 2), + 12130_R5; M-PCR; annealing: 58.7°C  |
| 12130_R5 (555)    | LmjF.27.2030 (Fig. 7)      | ATGTTGCTGAGCCGACTCTG   | See 12130_F5 (554)                                                    |
| 12130_F6 (576)    | LmjF.27.2030 (Fig. 7)      | CACGCGTGTGTGGTATG      | Sequencing                                                            |
| 12130_R7 (580)    | LmjF.27.2030 (Fig. 7)      | CATCAAGCCCGTGACGCTG    | Sequencing                                                            |

\* For PCR amplifications, the following kits were used: D-PCR, Dream Taq™ Green PCR Master Mix (Fermentas); M-PCR, Maxime PCR Premix Kit (i-Taq; Intron Biotechnology).
