# Supplementary material for: Resequencing and assembly of seven complex loci to improve the Leishmania major (Friedlin strain) reference genome
Source: PubMed Central journal article supplement (PMC4746890; doi:10.1186/s13071-016-1329-4), 2016-02-08
Supplement: 13071_2016_1329_MOESM2_ESM.pdf [file 13071_2016_1329_MOESM2_ESM.pdf]

## Material supplementary 2

The seven new assembled regions lost during *Leishmania major* Friedlin strain genome assembly. The sequence headers include current genome coordinates (1-based) where the new sequences must be inserted in between. Additionally, 100 nt upstream and downstream sequences are provided in red to help to localize the insertion place (these sequences are not part of the new assembled regions). CDS within the new assembled region are indicated in bold.

>H150:LmjF.15:598566-601599

```
caacgcacagacgcttagcattgtagccacacaccccacaacactgcaacattcccccttccagcgccc
gcattgcaaccgctgctcgaaacctgctgctCATCCATGACACAAGCGTTCGCCCTAGATAAGCACAGCCGC
CAACGTCAACACAGCGCTTGCACCTTACCAGACACTTTCGGCACCAGGAGCAACGGCACCACCGCGCGCTA
TTACGGCATCAACGATAACCACGGGACCGACGCCTAAACAATCGAGGATCGGATGGAGTCGCGGGGCCA
TCCAGGATCTCTTGCCACTTTGCGCGGTTGGAGTTTACCGTGTCCACACACCACTGCATTCCATGAAATA
GGTTGCCACAATATCCCGAAGAACTTGCAGCTACGAAGTCGATGAAGCCAATCTGCCACGCGCCAG
CTCGTTGTTCTTCGACCGGTCAAACATCGGCAGCACCTCCACGCCCTTCTCCTTCTCCATGTCACCCTGA
CGGTAGAACTCCTCCGTACAGCCATCGCCACATGCGCGACGTCTCGAACGGTTTCGTACATTCGACA
CGTCACCGGCTTGATCAGCGTTCCATCACCAGGCGACGAGATTCCTGATCGTTAGAGTCGTAGCCGGC
CTTCGCCATATCATCGAAAACCTCGACAAGTCCCCGTGGCGAGCCATATCAGTGGCCAGCACGCAATCG
ATCAGCGCGCGGTACGCATACGCAACGTCTTGCCCGCTCAGCCCCCTCGAACACGTCCGCGGGCGGGTTCGG
ACAGAACTCTGATGGCGAGGCTGCAGTGGTGCACCTCCAGCACGGAGTTGTTCCCGCTCGCGCTGGAGAG
GATGCCTAGCGGCGAGTCCGTCTTCAGGTAGAAGCTGTTGTTACGCCCATGTGGTCAAGATCGTGCACC
AGTGCCGTACGAGCAGCACGTAGCACTCCAGCTCTGTACAGGAGTCCGACGCCCTTGCCGTGTGTACAAGT
ACGTGTGCAGCGTCTGGCACACGTCCACGACGTGGTAGAAGTTGTGGTACGGCACCTCGGCGGTACCTGCG
CGGCAGTCAAGTGAAGTTCAGCAGTGTCTGTCTCAGCGAGCCAAACTTCTCGGGTAGACCACGTTC
CATAGCAGTTATACACAACACCGGCGAGCCGCATCCATCGGCTCGCTGTACTTCTCGCGCACCTCAAACA
GGTTGAAGTCCGGTGAAGTGAAGTCAATATGCGCCCCGAAAGTCGATCGACATCACTGCCCTCACGCTCCTC
CGGCGTCAACCGGATCACCTTCGCACTCTTCGGAGCACGCTGCGCTGTAATGCTGTTGCGCTGCAGGTTT
AAGGTCACTCGCTCACGACCTGCGTTACCGCGAACTCCAGCAGATGGCTGTTGTTGATCGAGATGCCCG
CAACACGCGAGAACACTTTAAACGTCTCTTGATCAGTGGGTGTAAAGCAGGTACGCTACCGTCTGTCGCC
GAGCTTGTGACGAGCTGCACCACGGCAAGCACCTCGCCATTCAGCATAATCGGCTCGCACAGGATGGAC
TGTGTGCGGTAGCCAGTGCCTGCGGTTCCACAGCGTGTGTAAGCGCGAGTCAGCGTACGCGTCCATGATAT
TCTCGCAACGCGGACTCGGCAACAGTCCCGCAATGCCCTTGCCCGCAGGGAAACCGGATCTCGTTCGC
GCTGTCCGCCATCTTACTGTACAGCTCATTGCGCTCCTTATCCAGCAGAAACATCGATGACCTGTCCGCG
TTCAGCAGCTTCTTCGCGCCGTGCAGCACGTGCCGCACAATGCTGTCCACATCGCGGATGTCCGTATTCCG
ACAGCAGCGCCACAACGTCCAGGATCGCGTTCGCTCTTCTTCTTCTCCTTCAGCAGCGTCTCGTTGATGCG
GCAGTTGCGCAGCGACGCCCGCAGCGAACATCGAGAACGTCTCGAACAGCTCCTCGTCGCGCCGTCCAAAC
ACGCGCGGAAGCCGCTGCCCGCTCTGTGTACCATGTCCAGCTTGTGATCAGCTGCGCAACGGCAACGA
TCGTGCCCTCGAACCGGATCGGCAGACACAAGATCGTGCAGGTGTGGTAGCCAGTCACCTTGTCCACGGA
CCGGTGAACCGGTCTGCTCGTACGCGTTCGGGATGTTACACGGCGCCAGATTCCGCAACGTGACCT
CGGATGCCCGTCCCGCAGGCAGCACCAACGTTCGCCCTCCTCGAAGTGCGCCCTCAGGCTGCCGTCCG
CTTTCACCAGGAAGATGCTACACCGGTGCTCTCCGTGAGCATCTTGGCCGTGTTGATGATGGACTGCAC
CAGCACCGACTCCTCAACGTGTCTCGAGCAAGCCGTGTGCCATGCCACCATGGCCTCTGCCCTCCGA
GTCTCCACCGCAGTGTATCGATGGAGGTAGCGTTCGCAAGTGTAGTGCCGCCACTTGAAGCAGGTACC
CGAAAAACGGCGTGCTCGTGTGATTCGCGTCTCCACCTCCAGGCAGCCGACGAGCTGGCTGTTGTA
ACATAGGGGGATGTACACCGTGTGCGAAATGGTAACGGTCTGCTTTCGTCTTCGCACACCTGCCGATGGGG
GTCGATGTATCGATGGTTGCAACAGTGTGCTGCACTGGGTGCGATAGCACCGCGTCTGTTGTGTTGGCGT
AGTGCGTGCACACTGAACAGCTCACAAGTTTGGAGAATCTTTCATTGATGGTGGCGACAATTTGGGCGAG
GGGGTTCTGGAAGATCAGGCACCGCTGCGCCAGTTGAGCGTACTCGTGCAGTCCCAGTTCCTGCGACTGC
TTTCGAGTGGCGCTGCTGGGCATGCGGCTCTGCTGCGTGGCCGAGATGCTAGATATGCGCTGCTGCA
AATTGGCGAAGCGCGGCCCTCCGCGTCTGTTGAGCTGAACCCCGCAGCGCTTGTAAACGGCTCAGAATGCA
GTCGCACAGCGTGAAGTGCCTCGAGGAGATGGTCTGTTGCCGTTCGGAACGGTGTTCACCCATCGAGGAC
GCCCTCTTGGCCGTGAAATATGCCATGGCGCTACGCTGGTTTTCTCTCCGTCTCTCACTGTGATGCGGTGG
ACGTGCGCACGTGTCCAGCGCTGAGCGGGCACCCGTGAACGTGTATAGGCCACAGCTTTCGGATCCCTAT
GCTTTTTTCTATTGTGGTTCGTTGAGCCGAGACAAATGGTGAACGATGACCGAAAACACGTCAAGGCCGAC
GACGACAATGAGGGTAGATTGACGCTGAGGTGAGGGACTTGAGACGGTTCGACGTGCGCACACACACAC
```

ACACACACGCACGCACGCACTGGCAGACGGATGCAGAGATGCACGCACGACAGACATGACCGCATCCGAT  
TTTTTGATTGGGTGCATGGATGGAAGAGCGCACAAATGGGGAAAAGAGCCGGGAAAACAGCCAGGAGGGCA  
CGCAGTGGCCACGGAGAGTAATCCGTGAGAAGGAGAGAGATGCATAGGGAGAGAGCAGCACGAAAGAGGC  
CACGGCAGAAACGCACCGTCTACTCCTGTGAATGACGCCGCTCCTTTTTTTTACAGTTGCC'TAATCGCCGGG  
TCGCACATGGGGCAACTTTGAATGTGCCCAA'CTTTGGCGGTCTCCATAACAAGGGCAACGGGACGGGCC  
AGCGGGAGATTCTACTCCAACGACCGCTGGATAAAGGAGCGGTGCAGAATCGCGGCAACAGATAGGCGGC  
ATGGACTAGGCAGGTGTGGTGGACTTTCATGATTTTGGCAGGCCAGACTAATATAACAAGTAAAACCGAGAT  
GGTGCCCGTGTACGCGAAAAGGGTTACAGTACGGTAAGAGGCGTGC'CAAGGGACACAGGGGTGCGACAT  
ACGGGGTGGGGAGGCGGAGGCATTGCGTTGCTCGGGAAAAAGAGGGGGTGCCAAGAAAAAGAGAACGCTA  
AACAAGGAGAAAAAGACGGGGAGAGGGGAGGGCGTGGGCGACGGTGTAGTCCGCACACCGCGCATAGAT  
TACATGCATGAAAAGCAACCACAGGAGGAGGAGGAGGAGGAGGAGGAGGAGAAGCGAACAAGACGAAAAAA  
AGTCCCCTGGGCATGGCGGCGAAAAAGCAGGAGCGAGGGGTGGTAATGATGGCACCGAAAGGAGGTGAT  
GAGGCCACGAGACCGTCCATGCATGCTTCCCTCGTCCCAA'CTTCCCTCACCTTTGGACGGACCTTTAGCACG  
AACGTTGAGGAAAACACCAACAGCACACAGCCCTCTCATAGCCGTATCCTCTCTGTGCCACGACCTTATCT  
CGCACACGTTGCCTCGCCCTGTCTCCCGTCTCGCAGTACCCCTCCAGAGACCACAAACGGTTTGC'CGA  
GGCTTCCCTCGCACATGTCACACAGCAGGCGCCAGCAGCATCTTGTGCTACACAAGTCTGCTGTTTTCTC  
GCCGAACAGAAGCGGGAGGAAGGAGGACAACGAGAGAAGAGCTGTTACATTTGTTCTTCTCGACATCACAC  
AACGCAAGCCTGGCTGCTCCTCCTCCATCGCTCTCTTGCAGACCCAAAAA'CTTCGAGAAGAAAAGA  
AAAGAGGAGACACGCGAGAACGTCACAAGTGCACCAAGACACTGAGAAGGACAGGTAGTAGGTGACACAA  
GAGATGGAAATGAGTCAAGGAGAGGGGAGTTACAGCATGTTCA'TTTCTCTGTCATGCAACATGAGGTGGA  
GCCCCACTCTTGCACCGGCCCTGTACAGGCCCTATCGCCTGGTGC'GAAGCAGCTGCAGAGACACACGT  
GACCGCAACCGCGCAACTCGGCCATCTGAGGGCACAGCCTCAGCCTCGAACTCTACCCGCCACCCACCCA  
CCCACCCCGCCTCACAGGTGCGCCACAGCCGCTCACGTTGTGCCGGTGC'CCACACGGTGCATTCATC  
GCGATGGCACAGGCTCC'CCACAGCAGCAGGACAGTGTGAGGGCCGGGGTGGGATGCGTTCGAGTCACGC  
CGGCACTCTGCCATCACATGAATCGTGC'GTGTGCGTGTTCGCAGGTGCTCCGGCGCCACGCCATCCGG  
CACCTGACGGCCGATCCCGCAGCGACATCTTGTCTGTCTCCCTGCGTTATAGGTTGACCTTGACCTGTC  
GCCAGGAGAAGCGGTTC'CGCACTGGCAGGGATATAGGAGGAGAGGGTGGGGGTGGGGTGGGGTGGCGC  
CGCTGAGCTTCTCC'CCAGAGACAGAGTTTGGGTGCACGAATGACCC'CCACTGGGGGGGGGAGAGAT  
GCCACGCGCTGCGGGGTGCC'CCACTCCACTCCGTCTCACCAGGAGCACAGATGCACACACC'TACGAGAG  
AAAAAATGGGAGAGGGGGGAGGGAGGCGGGT'GAGATTCGTGACGAACAACAAAAGACAGACACACGAAAA  
AAGGGGGAGAGAAAACGGATGCAAAAGACAGGAAACCATCTT'CGGGACACACACCGGAAAAAAGGAAAGGC  
GGATGAAGAGAGAATTAGGTGTGGTGC'GTGTGTGCACCTGCAC'TGCTCAC'TCCTCC'CCCTTCGTACCG  
TTCAGCCTTCAACGGCAAACCACTCCTCCGAAAGACGAGCAGAGAGAGAGAGAGAGAGGTCTGTT'CAAAAA  
GGGCTAATAGCGAGGAGAGAGGAGACAAGACGAGAGCCAAAAA'AAAAAACACGACTCACACGCCACAT  
GTGCCACACCTTGTCTCAGCAGTGC'GAGAGGCGCCATCAACCAGAACAGGCCCTGGTGCAGAGAGAGG  
GAGACTCACCAACACACAAACCATCCCGCTCGCGGATACAGCGACGGGTACA'AGGGAAATGACGGCC  
GGTGCACATACTGAGGTGGGGATAAGACGCGTAGACACGCACAGCAGAGCGGCGACCAACGGCACTCATC  
CGTCCATAGTGACAAGTGAGCTCACCGCTTTCACTTCTCGAAAGACATTCG'CCGTGAGTACTTCCGCGCG  
CTATTACGGCATCAACGATACCGCGGGACCGATGCC'TTAAACAATCGAGGGT'CGGATGGAGT'CGCGGCGG  
CCATCCAGGATCTCTTGC'CACTTTGCGCGGTTGGAGTTTACC'GTGTCCACACACCAC'TGCATTCATGAA  
ATAGGTTGCCCA'ATATCCCGAAGAACTTGGCAGCTACGAAGTCGATGAAGCCAATCTGCCCACGCGC  
CAGCTCGTTGTTCTTGCACCGGTCAAACATCGGCAGCACCTCCACGCCC'TTCTCCTTCCATGCTCACCC  
TGACGGTAGAACCTCCTCGT'CACAGCCATCGCCACGCTCGCGACGCTCTCGAACGGTTTCCATGCATTCG  
ACACGTCACCGCCCTTGATCAGCGTTTCCATCACCAGGCGACG'GTGGGTGTGCTTGTCTTTCTCAAACCC  
GCTTGTGCGCAACTTGTGAAGCGACTTAGCGCGT'CAGCGTGC'TTCGCCATATCAGTGGCCAGCACGCAA  
TCGATCAGCGCGGTTACGCATACGCAACGTCCTG'CCCGTCTCAGCCCC'CGAACACGTC'CCGCGCGGGGT  
CGGACAGAATCTCGATGGCGAGGCTGCAGTGGTGCACCTCCAGCACGGAGTTGTTCCCGT'CGCGCTGGA  
GAGGATGCCTAGCGGCGAGTCCGTCTT'CAGGTAGAAGCTGTTGTTACGCCCATGTGGTCAAGATCGTGC  
ACCAGTGC'CGTACGAGCAGCACG'TAGCACTCCAGCTCTGT'CAGGAGCTCCGACGCCTTGCCTGTGTACA  
AGTACGTGTGCAGCGTCTGGCACACGTC'CCAGCAGTGGTAGAAGTTGTGGTACGGCACTCGGCGGTACCT  
GCGGCGCACTGCAAGATGAAGTTCAGCAGTGTCTGCTCACGGCAGCCAACTTCTCGGGTAGACCACTG  
TTCCATAGCAGGTTATACACAACACCGGCAGCCGCATCCATCGGCTCGCTGTACTTCTCGCGCACTTCAA  
ACAGGTTGAAGCCCGTGAAGTGAAGTCATATGCGCCCCGAAGTCGATCGACATCAC'TGCC'TCACGCTC  
CTCCGGCGTCAACCGGATCACCTT'CACACTCTTCCGAGCACGCTGCGCTGTAATGCTGTTGCGCTGCAGG  
CTCAAGGTCATCGCCTCACGACCTGCGTTCACCGGCAACTCCAGCAGATGGCTGTTGTTGATCGAGATGC  
CCGCAAAACAGCGAGAA'CACTTGGAAACGTTTCCCGGTCCATGGGTGTAAAGCAGGTACGCTACCGTCTGC  
GCCGAGCTTGTGACGAGCTGCACCACGGCAAGCACCTCGCCATTCAGCGTAATCGGCTCGCACAGGATG  
GACTGTGTGCGGTAGCCAGCTGCCGGTCCACAGCGCTGTTGAAGCGCGAGT'CAGCGTACGCGTCCATGA  
TATTCTCGCAACGCCGACTCGGCAACAGTGC'CGGCAATGCC'TTGCCCGCAGGGAACCGGATCTCGTT  
CGCGCTGTCCGCATCTTACTGTACAGCTCAT'GCGCTCCTTATCCAGCAGAAACATCGATGACCTGTCC  
CGTTACAGCAGCTCTT'CGCGCCGTGCAGCACGTC'CCGCACAATGCTGTCCACATCGCGGATGTCCGTAT

TCGACAGCAGCGCCACAACCGTCCAGGATCGCGTCGCTCTTCTTCTTCTCCTTTCAGCAGCGTCTCGTTGAT  
GCGGCAGTTGCGCAGCGACGCCGACGCAACATCGAGAACGTTCTCGAACAGCTCCTCGTCGCGCCGTCCA  
AACACGCGCGGAAGCCGCTGCCCGCTCTGTGTACCATGTCCAGCTTGTGTGATCAGCTGCGCAACGGCAA  
CGATCGTGCCCTCGAACCGGATCGGCAGACACAAGATCGTGCGCGTGTGGTAGCCAGTACCTTTGTCCAC  
GGACCGGTGGAACCGGTGCTCCTCGTACGCGTTCGGGATGTTACCACGGCGCCAGATTCCGCAACGTGA  
CCTGCGATGCCCGTCCCCGAGGCAGCACCACAACGTTGCCGTCTCGAAGTGCGCCCTCCAGGCTGCCGT  
CCGCTTTCACCAGGAAGATGCTACACCGGTGCTCTCCGTACGCGTCTTTGCCGTGTTGATGATGGACTG  
CACCAGCACCGACTCCTCCAACGTGTCTCGAGCAAGCCGTGTCCGCATGCCACCCACCATGGCCCTCGATCTTA  
TTTGCTTCCCTCTTCTGATGGAGATGTTGATGCTGTTTCGAACGGCAACGGTGACGCACCCGGAGCAGAA  
GCTGAGCACAGGTAGCCTTGTCCCTTGGGATGCAGGCACCCGCGACCTCCACGCAGCCAACGAGCTCGGA  
CCGAAAACCAGAGGGGGATGTATAGGGTGTGGCAATCGTCAGCATGTTGCGCGCTTGCGCGCACTTGCC  
AAGGGCGTGACGTCGTCGATAAAGGGCGCAACACCGTTGACAGGGTCCCATAGGAGATTGTCGTTTGCGA  
TCACCATGTACGTGCGGACATTACCGGAGCAAGTACCGGCTGAAATGCGCTCATTAATCGCCGCAAACAA  
TACTGTTGGCTCCTTGGTGTGTCGCGAGCACTCCTCCACAAACGCGACAATGTCGTTCTGTGGGTTGTGC  
GGCACGTGCGTTGCATCGTCAAGAATGCTCAGGAAGTCTTCGTGGTCTGGTGGGTGAAGCCGCGCTAT  
TCGACCGGCTCTTGCGCGGTATCAGGAACTCGGTGCGCAGGGCTTGAATCGCCTCAGCTCTGTGGA  
GGAGAAGGATGTACCAGTCCGACGGTAGCGGCCAGAATCGACTGGCAGAGTGAACCCGCTCACATAGG  
TGATTGGAGCCGGCTGCGCCGCAATACGGCGCATCGGGGGAAAAGACCGCTGAATGCATCGCTGTACGGC  
GTCACTGCCAGTTGATAACAAAATCGAAGACAGCGCCAATACGAGCCGAAAAACAagagtgaacaaacga  
acaacaaagagggccgcgtggcgctttgcgctgatggggctcgcttgtgtgtgtgtgtgtgtgtgtgtgt  
gtgtgtgtgtctgac

>H155:LmjF.15:108225-109015

cattggcggttgatgaccttctctctctttcaccttttcatctctcccaccgtctcgctcctttgtacctc  
ctctctctctctctctcgcttctctcgaTACGTGACCCCACTCACAAACCCACTGACGACACAGCCGCC  
CTGTCGTCCTCCCTGCCCTTCGACAGACCCACTCGTTCAGGCCACAACCCCGTATCAGGTGCGAGTAAT  
CTGCCCAAGAGAAAACCTCAAGCATGCGCCGTCTGTCTTAGCCAGCTTATGTGCACCGCTGCCGCGCCCG  
CTTTCGCGTCCGCCGGCGCGGAAGAAGTACGACCTGTTCCGGTACGAGGTGGACACGAACACGGCGCCG  
TGGATCGACAAGGTGAAGAAGTGCCGCTACTACGACGAGGCCGGCGAGGTGCTGGTGAACATGAACGTGA  
AGAACTGCCC GCCGATCTGGAGACGTACAACCGGACGCTGCAGAAGATCTACGAAGCGCCGAGCAAGCA  
GGACAAGCCGGTGGAGAACGAGAGCAAGTTCTGCGCGATGATGGACCTGATGGAGGAGATGCAACACCGC  
AACAAGGTGAAGCCGAACGAGGAGTCTGGACGTGGGTGTTGAAGGAGTGGTGCAGAGTGGGCAGTTCC  
GCCTCGGCTACTGCGTTCGAGGCTGATGGAGGCTGAGTTCAAGCGGGTCCCGGCAGAGCTGGTGCAGCA  
GAACGAGGCGAACGCTTCGAAGGCGAAGGCGGACGGCAAGGAGCATCCGAGCACGCTGGCGCAGCAGCAG  
AGCCTGTTTCGACATCAAGATTCAGTAAAAGGTAGTGACGTTGGACTGATGACGGTGAATTTGGTAAGCAGC  
AGATGAGGGACGGTTTTGGCGCCATGGAGGGTACGTGAGTGCCTGATGTTTTGGGTTTTGTGCGTGTGTGCG  
CATGTATGTGCGTATCGTCTCCATCCTTCTGCCCTTCTCTCTCTCTGTACGACACACATGTCCACCCG  
CTGACCTCTCTATACTGCCTAGGTGTGGACCCCTTTTATGCGGTGAACCTGGTAGACGATGACAACCCCA  
ACCCCTTCCCCCGGTTGCGTGTTCATACACATCCATCGCCTCCTAAACTCCTCTCGCCGAGCGGTTTTT  
GAGTTGTGCGATGTGGGAGACGAGGCAATGGAGAGGCGGAAGCGACGGGGTGTGTGGGAGGAGAGCGAG  
GGAGAGTGCAGCACACACGCGTGTGAGCACTACAAGCCGCTCGTCCCCTCGTCTGTGTGGATGACGTGC  
GTGCAGGAAGTGTACGTGACCTTGGTTTTGTCTGTAGGAAGGACAGTGCAGCTCGACCTCGATCGATGACG  
ACGCGGGCGCACTGAAGCGAAAGGGAAAGGGAGGACATGACAGGGGAGAGGGATAGCAAGTGAATGAGG  
GTAATGAATGGAGCGGGTGGGGGACGTTAGTGTCTCTCTCTCTCTGAACGCTCGTGTGGAAACAGTGT  
ACAGGGGCAAGTTAGCAGGGCCAAACGACTCCGAGATGCGTGCCTCTGCTACTCCCTCACCACCTTACGCAC  
CCCCACCACACACACTCTCTTGCTCACCTCATCGCTCTTGACACGCGCACACACCACAGGCACACGCAT  
CCATACACAGCACGAGTGCTTGCACTGGCGTGCAAGTCTCTGTGTGTGTGCGCGCGCGTGCACCCCATCA  
CGCTGCCTTTCTCTCTTTTCTTTTCTTAGTCCCCATTTGTTTTGTTCTGTAGGCATAATGAATGGAGTG  
TTAGTTACACCAACGCGAAAACGACAGGGTCGGCAGCCACGTCCATGGAGTGCAGGCGGCGCACCCGAC  
AGGAAAAGGAGAGGAGGAGGAAAATGCATGCGTAGGAAGGGCGAATGTGGCGTCCATACCTTCAGTCTT  
TCCCACCTCGCACCGCTCTCCC GCCGCCCCACCTCCTCCGCCCTGCTCTGTGTGCCGGTGTATGGTGTAT  
CAACGCGAAAAGGAGAAAAAGTGTGCGAAAACAGAAAAGATGGAGTGGTGTCAAGACGCCCTTTATGAGTTT  
TCCCCCTCGTCTCGCCCTTCTACCGCTGCGCTGAGCACCGCAGTGGCGAAAAAGAAGAGGGGGGGAGGG  
GGAGAGCTCACAGCACTTTACGGTCTCTTGGGTGCGCTCTCTCTCTCTCTCTCTCTCTCTCTCTCTCTCT  
CTCTCGATGTGTGTGTGTGTGTGTGTGCGGGAGCGCCATCGCGCGTCTACGATTCTCTCTCTCTCTCTCG  
CCCCCTCCTTACCCTTCTTTTCATTCGGCGCACACTGCGCGCGGTTCCCTACACGCAGTCCCGCACAAAGA  
CTTCCCAACAACACTCTCGTCCCAGCAAAGCTGGCCCTTCGACAGACCCACTCGTCAGGCCACAACCC  
CCGTATCAGGTGCGAGTAATCTGCCCAAGAGAAAACCTCAAGCATGCGCCGTCTGTCTAGCCAGCTTATG  
TGCACCGCTGCCGCGGCCGCTTCGCGTCCGCCGGCGCGGAAGAAGTACGACCTGTTCCGGCTACGAGG  
TGACACGAACACGGCGCCGTGGATCGACAAGGTGAAGAAGTGCCGCTACTACGACGAGGCCGGCGAGGT

GCTGGTGAACATGAACGTGAAGAACTGCCCGCCGGATCTGGAGACGTACAACGCGACGCTGCAGAAGATC  
TACGAAGCGCCGAGCAAGCAGGACAAGCCGGTGGAGAACGAGAGCAAGTTCTGCGCGATGATGGACCTGA  
TGGAGGAGATGCAACACCCGCAACAAGGTGAAGCCGAACGAGGAGTCTGGACGTGGGTGTTGAAGGAGTG  
CGTGACAGAGTGGGCAGTTCCGCCTCGGCTACTGCGTTGCGAGGCTGATGGAGGCTGAGTTCAAGCGGGTG  
CCGGCAGAGCTGGTGCAGCAGAACGAGGCGAACGCTTCGAAGGCGAAGGCGGACGGCAAGGAGCATCCGA  
GCACGCTGGCGCAGCAGCAGAGCCTGTTGACATCAAGATTCAGTAAGACGCTGCGTGTGCCGCTTATCA  
CCTGCACTTTCTCCACGCTCCCTCCCCCCCCCCCCCCCCACACACACACACTTTTGTGGCAGCTCGTAG  
acggttcggtgcagaggatgcatcgatccgcggtgtgcggaagcgaattttgatcgatcgttaaggaa  
tgggtgagaggagatgcaagggctgcatg

>H141:ImjF.24:268817-269759

gttcggtggtggtgagcgttctgcttctctcggtcctctcctctcgcgcgccatcacgtgtgacgcctcct  
gagcatctctcgctcgctctctcttccctccGCATGCCCTTGTAGACCCCTTCATGTCCAACGCGGTGCACGG  
TGCAGGTTGCAGCGCACATCGCTCCCCCCCCAAAGCGTTTACGTGTATGCGCGGTCTCGCCCCACCCC  
ACCCCCGCTCGCTTCCCGCGGCGGTGCTTCATTTTTTTTTCTTTTATTGTCAAAACTGCGTGTGTGTT  
TAGAGGTGGGGGGGGGGGTAGCCAAGCCGCCACCACCTCTATCCACGATAGCCCTGCCAATGCCGA  
ACCACCTCTGGAGGTGGCAGGGCCAAGTGCCACGGCGCAGGGGGAGGGGGGTGAGAGCGGTTTGTATCG  
CTGCTGATGTTGGCCGTCAGGTTATGCATGGCGTTGCGTCGGAGAGACCCGCGATCGTGAACGTATTTGT  
ATCACCCGTGTGATGGGCAACGTGCCAACGTATGTACCCGATTGCACCCACACCCGCCCCACGCTGCT  
TCGCGCCACCCAGATGGGGAATGCACCAGGTGGTGACCGACATAATGGAAGCTGGTGTGGATGGGTGGAG  
CTCGAGGCAGAGGTCTGTGCTGAGATGGCTGAATGTCCGTGCATCACCGCAATGCAAGTGTCCCGCGCTGC  
TTCGCGCCATGCGGATGGGGACCCCTGTGAAAGGGCTGGCGGGGCGCAGGTAGACTGGGATTGAACACAT  
GTTGTGCGTGGCAGAGAAGTGGCACGCGTTGTGGAAGACAGGCAGGCAGAGGCAGTGAACGCAAGCCT  
GCTCGTTGCACTTGCCGACCCCTCCTCTCCTCCTTAGGGGCCATCTCCGCGTCCCAGAGCGAAA  
GAAACGGGCGCCCTCCTGCATTCCACACTGACTCTCGAACCTCGCTCCCACCCACCCCTACCGC  
TTTACTTTTCATATGCGCTCCGCCATTACCGCAACCAACAAACCTCTCATTTCGACTCGCGTGGGG  
CTCATCAAGCATTACTCGACCCACACACACCCCTCTATTCTCCACCGCCTCTCTCCTCCTCCTCTG  
CCCCCGCACACCGTTAATGCGAAGCGCCAACCTAGAAATGTCCTCCAAAACGATCTGCAGACCAAGGCG  
GCGTGCACGCTGCGCTCGCGCGGTGTATATGTCTGACGAACCGCTACCTGAACCGCGGTACGGCCTTCA  
CGACAGAGCAGCGTAGGAAGCTTGGCATCCTTGGTGCCCTGCCGCCACCGTCGAGACCCCTCGAGATGCA  
GGTGCAGCGTGCCTGGACGCAGCTGTGCCGCTACGACAAGCCCATCAACCGCTACCACCACCTGGTCAAGC  
ATCCATGCCACGAACACGACGCTTTACTACGCCCTCGTGCTACCCACATCGAGGAATTGCTCCCCATCA  
TCTACACGCCGACCGTCCGGCAGGCTGCCAGAACTTACGCAACTACTGGGTGCGTGAGCGCGGCATGTT  
TTTGAGCAAGTACCTCAAGGGTCACTTCTCTGAGGTGATAAAAGATTCCCTGTACGACAACGTCGACGTC  
ATCGTGATCACCGATGGCTCCCGCATCTCGGCCGGGCGACCTCGGCGCCAACGGCATCGGCATCAGCA  
TCGGCAAGTGCTCCCTGTACGTCCCGCGCCCGGCTGCATCCGAGCCGTGTGCTGCCGCTCGTATGGA  
CGTTGGCACAAAACCGGAACGGTATCTGAACGATCGCGAGTACCTCGGCACCCGCGAGAAGCGCCTCGAT  
GACGATCAGTTCTACAGCCTGCTAGACGAGTTTATGGAAGCTGTGAAGGACACCTGGCCCCTCCGCTGTGCG  
TGCAGTTTCGAGGACTTCAGTAACAACCACTGCTTCGACATGCTGGAGCGCTACCAAAAGAAGTACCGCTG  
CTTCAACGACGACATCCAGGGCACCGGCGCGTCAATAGCTGCTGGTTTTCTGAACGCTGTCAAGAAGTCC  
GGCCTTGGCCCTCTGGAACAGCGCATCGTCTTTCGGCGCCGGCTCTGCTGCTGTGCGTGTGGCGAAAA  
ACATCGCCGACTGGCCTCTCGCATGTACAACATAGACCTTGTGCTGAGGTGCTGAAGACGTTCTACCTGGT  
CGACACGAAGGCTTGGTACTGAAACCCCGGTTGACAAGCTGGCGGCGCACAAAGGCGCTGCTGTGCGCGC  
AAGGCAATCTCGGCTGAAGACAGCCAGAACCTGAAAGTCTGCTCGAGGATGTCGTGCAAGTTCGTGAAGCCGA  
CAGCCCTGCTTGGCTTGGGCGGTGTCGGTCTTGTGTTACGGAAGCGATAGTGAAGAGCGTCCGCCCAA  
CGCTGCCCGCCCGATCATCTTTCCGCTGTGGAACCCACGAGCAAGTCCGAGGTTATGCCAGATGAGGCG  
TACCCTGGACCAACGGTGCAGCTATCATCGCTCCGGCAGCCCTTTCCGGCTCCACCATCAACGGCA  
AGACCATCAAGCCGTGCAGGGCAACAACCTGTACGCTTTCGGGTGTCGGCCTTGGCTGCGCGCTTGT  
ACAGCCGCTCTATATCCCGATGACCTCCTGGTGGCTGCCCTCGGCGTGCCTGAACCTGCTCACGACGCCG  
GAGCAGATGGAGGCGGAGCAGCTGTACCCGCCGTTGGAGGACATTCATAACATCTCTGCCACATCGCCA  
CCGAGGTTACCATGGAGGCGCAGCGCTCGGCATCGACGGAACAAGGGCTGCCGCGCGAGAAGGATGC  
CATTCTGGCGGTATAAAGGCATCTCAGTGGGTGCCGCACCTACCCGGCAGAGCTGGACGTCAGCCTTCTG  
TGAAGGAAGGCGCTAGACTTCTGCACTGTGCGACGGTAGCGCTGCGGGAAGGCGGTGCCGCTGTTTGA  
TACGTGCATATGTGCTGTGTGTTACTGTGTAGTTGTATCCGCCGTGTGCACGCGCATCTGTGCTCAACG  
CTACCTATAAGCCCTTCTTTCTTCTTCATGCCCGCACTCCGGCCTCACCTCCCCTCCCTATCGGCCCCCT  
CCATGAACGCATGGTTGCGTGCAGTATCTTCTTCTGCGCGCCTCTGTGCCGATGCTGCCCTTCTGCA  
TGGTCTGTGCGTGGGCGTGTGTTGTCACCTTTCGGAGTTCTCCTTTTACCGTTATCCCCACCCCTCCCC  
CGCCTCCTTTTTGTTTGTACTTGTTCATTGCTTCCATTTCTATTATTATTATTATTGAGACGGCGATG  
CGCGCGTGCATGTGTGTAATATGTGTATCCGCCCTTCTTCTTCTTGGAGCCCGACTTCACTCATT  
CCTCTTTTCGCTTTTCACTTTGGCTGTTCTGCGGATCGCCCCCCCCCTTTCATCTCCCTCTCCCTCTT

TCGACCCACCCCTGTGACCCCTTACTCCCTTACTGGGTACCGCTCCGTCCGTGTTGTGGCT  
GTGTGCCTCCTAGCATGCGTGCCTTTCTTCTCGTGGGGGAGGGGTATCCGCTTGC GGATGTACCGATGC  
TCATGCTGACCGTTCCTTACTTCGCGCGTGCCTGATTTGTTTGTGTTTGTGTTTGTGTTTGTGGGGAGGGA  
GGGGGACGGATCGTCACTCCACATGGTGTGTTGCCCCGTGGGCGTCTCTCACTTCCATACACTCTGTGTGTG  
TTGGCCCCCTGCCGGATGTCTCTTTTCGGGTGTGCGTGTGCATCTCGCTTCTTCCGCGCAGGATGTGCGA  
CTCGCTTGCCATGCCGTGTCTTGAGCGTCCCTCAACAAGCTCATCTCTCCCCTTCCACGCCTCTACAT  
GCTGGCGTCACTTTTCGCCCGGACACCGGAGACGACCCCTTCCCCCTTCCACCCTCTTCCCGTAT  
CCCCGCTGTGACAACTGAGGGGACGTGAGTGGTGGAGAGATAGCAATAGGCCGACAGACAGCG  
TGGGGAGGGGAGTACGCACTAGCGCGAGAGACAGGCAGAGGGGAAGAGGGGGCAACCAGAAAAGAAGCA  
ACAACGAAAGCTAACACAAGAGTGATCGGGTATCTTTTTTGGGCGCTTAGGGGGCAATGAAGGGCGGGGC  
AAGGGGTGGTGAAGGTGTGGATGAGGGAGTGTGGTTCATGCGCATCGCCACAGGAACACGCTCCCTCCT  
CTCCCCCTGCCCCCTCCCTCCTCTCTCTCTTTCCCTGCTATGGTTACTGTCTCACGCAGGCCCGGGGTGT  
CGCTCTCCTTCTTGTGCGGATGGAGCCTGGCACTTACTTCTTTGTTGAAATATGTTTCTGTTTCTGTTA  
CTTCCGACTTTTTGCGTGCCTGTACCCCTCTTCCCTCGCATCCGGTGCCTGGAAGTACAGAGCTCTGCA  
CCCCCTCCACTTCCACTCTCTCTCTGCTGTGTGTGTTTAGAGGTGGGGGGGGGTAGCCAAGCCGCC  
CCCACCCTCTATCCACGATAGCCCTGCCAATGCCGAACCCTCTGGAGGTGGCAGGGCCAAGTGCC  
ACGGCGCAGGGGAGGGGGGGTACAGCGGTTTGTATCGCTGCTGATGTTGGCCGTCAGGTTATGCATGGC  
GCTGCGTGCAGAGACCCGCGATCGTGAACGATTTTGTATACCCGTGTGATGGGCAACGTGCCAACGTA  
TGTGACCCGATTGCACCCACACCCGCCCCACGCTGCTTCGCGCCACCAGATGGGGAATGCACCAGGTG  
GTGACCGACATAATGGAAGCTGGTGTGGATGGTGGAGCTCGAGGCAGAGGTCGTGCTGAGATGGCTGAA  
TGTCCGTGCATCACCGCAATGCAAGTGTCCGCGCTGCTTCGCGCCACGCGGATGGGGACCCCTGTGAAA  
GGGCTGGCAGGGCGCAGGTAGACTGGGATGAAACACATGTTGTGCGTGGCAGAGAAGTGCACAGTTGAA  
GCGCAGCTACGCCGTGTTCTTTCTGGGCTCACAGACGGAACTAAAGGGGAGGAACTACAGAGGAGGC  
AATGCGCGCAATGCTTCCGCGCAGCGTCTTCCACCATCATCATCACCCGTCCCCCCCCCGCCTC  
GTCCCCTCTGCGGTGTACCCGCACAGCCACAAAACATCGACAACAAAGTACTTTATTGCTTGTGTGCT  
CTTCTTCATGTACAGAACAACGCACGAACgtatgcatacaaggattggtgaaggaaaaagaggagacgt  
gtcatccgcatccctcgctcttccccctgattcctcttcatcctcataccctccc

>H147: LmjF\_14:341556-342022

tcaacgaaaggagaggaggacagaacgaagtcgatgagcaccgcgacacaaacaccatgcaacgccac  
tacgcacacgcccttaccgctctctctacATGTCCGTAGCTGCCCTCACGTTGCCAGCTCGAAGGTGCC  
CCTCACGCCTTCGCAATCGGGTTGGCCTCGAAGCTGATCTTGAAGCCGTTCCGGTCGCCCTCGATGAACA  
TCTCCGTGCTGTCGGCGCAATCTCCAGCTCACACTTGAACTCGCCAGACTCCTCGTCTTTTTGCAATTGT  
CGTGTGCGGATGGCTCGATCTTGTGTCCTTGGCGAACGCGACCTTACCACCATTGGTAGTTGCTG  
GTGTGCTTGTAAAACGCCACTTGGCTCCTCGTCTTACGATGCGGAACAGCAGCCCGTTGCCGTTGT  
CCTTGAAGCACTTACCACGGTGTGCGCTGTAGCCGGCTGGCCGTTCTCGTATTTGATCTCAGACAT  
GATGGTGGGTAGGGCGTGGGATAGGAGGGGGAGGGGGCGATGAGGAGAGGGAGGGCGATGGGGGTGTGT  
GGCGGGGATGTGCTGTTAGCGTGAACGTGTACAGTTGTGCTTGTGTTGTAAGTATGCAGAGGAGAAGG  
CTTATGCTAGCTGATGATGGTGTCTGGGCAGAGACACAGACACAGAAAAGGGAGAGAGGGGGTTAGACG  
CTCACGTGCGCATGCAGGGCATCGGCGGACCAGCGGAGACGAAAAGAAAGACGAAGGGGAGGGGAGAGA  
GAGGAGTGCATGTGTGTAATGTTCTCAAAGTGGTTCGCGCTGAGTGGCGTGTACCCGATGCTGACCC  
GCGCGCGTGTACAGTAAGCAGGAGCATGGAATGGTAGCAGTAGTCCCTCGCTGCCCTAGTCCCTCGTAG  
AGCCAGCGCGGAGGGCATCGGCGGAGGCTGGCTCAAGCAAGCCTTACAGAGGGGGAGGCAACCCGCGCTG  
GGCCGCGCCGCACACACCCGACCTAAATCCGGCGAAGACGACCCACAAAAGAGAGAGAAAAGACAGC  
CCGTGCTGCAAGCGCGCTCTTCCCTCGATGCTTGTTCGCTCCTGCTGCGAGGTGCTCTGGGTCTTTG  
TTCGTGGGCTTTGCCGATGTTCTGTCTCTACATGTCGTGTCGACGAGGGGAGGGAGGGAGGGAGTTGA  
GAAAAAGGTGAAAGCGTCCGCGGGGACCGCACGAGATAAGGGCGAGGGGAGGGGGAGGGGCGAGAAC  
AGGTGTCTATGTATGCTTGGCGTGCATAATGTTTCGTGGGCGAATGCACGCGAGAGCGAGAAATAGAAACA  
CGGAGGGAGTGAGGGGATATCAGAGGCGAGGAATGCGATCCATGCGTGAGAGCGGACCAAGTCCGTCCT  
GTCTCTCTCTCTCTTTTACATACACATACATCATCTCCCTAATGCACACATCCACACATGCTAGC  
AACCGGGGCATTGACGGGCATGCTCAACCCCATGGGATCGCATCATGCATGTCACCCGCCCGCCCG  
CACGCACCACCCACCACCCTCTCTACTCTCTTAGACTTCACTAACCCCTTTTTCTCTCCAGAGT  
TTGGAAGATCGATCCTCTCTCTCGCCCCCTTCCCTACCACCATAGTCCACTTGTGTTTCTCACTTCTCACTT  
TGTTTTCCATAACCGTGCCTGCTCGTTGTTTCGAAACAGTTTCCCCAGGCCCTTCGCTCCGTTCCGTTCTT  
TTCTCTCGTGACACCCGAAAATACACAACAGCCACCTCAGCGCAAAGAACCGAACACGAAACGAAGAC  
ATGCGCGTCCGCACGTGTCGTCGGTGCATCTGCCGGAGAATCTGTGCGACACACAACGCGAGAAGACGAA  
AGGGCGTGAGGAGGAAGAGCGAAAAAGAAAGTAGGGTGAGAGGGAGGCGATCACCGGAACAGCGTACA  
ACCGAGACGATGAAGGCGTGCGGCGACGGCGGAGGGCAGAAGGGCAGGGAGGGAGGGGGACACGCTCCA  
AGATCAGAAGAAGCCATACCCACCCACCCACACTCATCCATCACTACCGCCACCACCACAATCCTGCTT  
TTAAAAGGAAAAAGGTAATAAACGATGAAGCGCGGACAACATGGCAGCGAAGACGTGGCTTCGAGAGAG

CGAGTGC GGGGCACACAGACGCATACACATAATATATATATATATACAGGCGAGAGAGGAGACGAGTAGA  
GAAAGACAAGGACACATGGCGCATACGAGGCATCACAAACACCACACACACAACAACCACAACAACGA  
AACGAGACGAAAACGATGCGAGGTAGTGAAAGAATGATCAAAGATAAAAAATGCGAAGAGAAAAGATGGGGA  
GAGCACTCCGCGCCCTATCGATGCGTCCATCACACCTCTCCACCCTCGCACTCTCTATCACAGCGACGCG  
TAAACAGAAAATGTATCCGAGAGGCTAAAAGAGTGGAGAGTCAGGCCGTACCGCCAGGAACGTGCGTTTCGC  
GAGACACGCTTGTACTGGAGCACGTCCATGGTGAGGATGACCGACAGGGGAGCAAGAGGGCGAGAGGTA  
CAGGGGGTATCGTAAGACAGAGAGACGGCGTCGAACACTGCGGAGACTGGAATCCCTGTTGCTGCGGCGC  
ACTTGACAAGAGCACGCACTGCATATCTTTGCCACAGCTGCCACCATCTTCTCTCTTCTCTCACACGT  
CACGCTACCCCTCCCTACTTTCTTTCTTTCTCGCTTGCAGGTTGCTTTAGCTTCTACATGGCATCGCTGT  
TTACGTGCGAGTGCACACGCCCCTTACCGCTCTCTCTACATGTCCGTAGCTGCCCTCACGTTGCCAGCT  
CGAAGGTGCCCCCTCACGCCCTTCGCAATCGGGTTGGCCTCGAAGCTGATCTTGAAGCCGTTCCGGCTCGCC  
CTCGATGAACATCTCCGTCGTCGTCGGCGCAATCTCCAGCTCACACTTGAACCTCGCCAGACTCCTCGTCT  
TTTTGCATTGTCGTTGTCGCGATGGCCTCGATCTTGCTGTCTTGGCGAACGCGACCTTACCACCATT  
GGTAGTTTCGTTGGTGTGTTGTAACCGCCACTTGGCGCTCCTCGTCGTTACGATGCGGAACAGCAGCCC  
GTTGCCGTTGCTCTTGAAGCACTTACCACGGTGTGGCGCTGTAGCCGGGCTGGCCGTTCTCGTATTTG  
ATCTCAGACATGATGGTGGGTAGGGGCGTGGGATAGGAGGGGAGGGGCGATGAGGAGAGGGAGGGCGA  
TGGGGGTGTGTGGCGGggatgtcgctggttagagtgaaaatcctgaggaagcttcacgatgcgtgtgtg  
tgcgtgcgtgtgttcagagcacaacgcgtacgaaggggagcagg

>H153:LmjF.19:109375-111190

gcacttcttgccgatgggggtggcgggatgaggggtggggcggggtgttgagaggaaggctcacgggctg  
gggtgagtcggtgactcggcaaaagacgacgCCTCGTCCAAGGACTGTTGTTAGCACACACCCTTCTTCCC  
CATTCCGGCTCCCGGCAAGCGACTCTTTTTTCCGGGGTTGTCTTCTTCCGAGTTGCGAGACAACAAGAG  
GACGTCTTGCCTAGGCGCGTGCGGGCACCTGTCCGCATTTGGATGCCGTGCAGCCACGTGTGACGAGCA  
TCGACACGCGTGCAGTGCTAATGGCGTACTGCCCACTGGCTCGCCTCGCCTGTTGTTGTCCTTATATGCCG  
GGCCCGCTGCCCTCTGCTGCGCTGTGCGAGGGCGTCCGGCTCGGCGTTGTGTCCTTATATGCCGCG  
TGTAACCCGTAGATCAGGCTCACGGCTCAAAGCGCAACTTCTTGCACGCCATAATCTTGTCCACAGCGGCC  
GATTGTGCACACC CGCTCGCGCTGCGTGGGCTCCTCACTTGTGAGGTGTTTATGGCTGCACACCCTCTC  
TGCCCTCTCAGAGGGCCAGACCACGGGCTCTGTGCGCGGGCGCATGCCATGCACGGGCCCCCTCGGC  
TGGTACACCCGACTCCTGTGGGGGGCGTGCATATTCGGTAGAGGATGGTGTGTCCCTGCCGCCACAGAC  
TCATGGCCGCTTGCCTGTGCTGGCGGTGCGGGCAAGCCCCGAGACGCGCCCCGGTGAATGGACG  
GAAATGGAGGATGAAGACAGCGAGCCCCGAGACAGCAACGCCGTCCATAAGCAGGCCCATGATCCGAA  
AACGTGAGCGCTGTGTGCACGCTCTCAAGCACAGGTGGCATGGTGTGTGCGATTACGCAAGGCATCC  
AGAGCCGGCAGAGCAAGAGTATGGACGGAGAAGGCGGGAAGGGATCCATGCAAATGGCCCCCACC  
GCCACACACACACACACACACAATGCATGCGTGCAGCATGTGCGGCATGCCCTCCATCTGACCGTG  
TGGGCTGGCGCGGCGCGATGCGGGAAGCACGCCGAGAACACGGCGAGTCGCGCCATCGAGTCCCTCCCG  
CTCGAATGTGGCGAGCCGCTGCAGAACTTGTGGAATGCCGCGGCTTGAGGCGACGGAGGGCGAAGCATG  
GCATGCGGCCCGGGCACAGGGACTCGGAGGGCCCTGGCCCGCAGCTGGCCAGCTTCTGCTTGAGCTCAC  
CAGGCATGCACCTTGACCACCACCTGTTATCTCACAGCGGATGCCACCCTTCCGGCTGGGGCAGGAC  
CCTGGGCGCAACCCTCTCGGATCAAGGCATGCCGTCTCCCGCTCTCCGCTGGCGCTGATCGCGCAGC  
GCGTATCGGAGAAGGGGACGAGGAAGGGCGAGAAGAGTCCGTACGACGCACGGCCCCGATTTCGACGGCAG  
GACGGCTACGTCTGTTCCACCAGGAGGTAGCTGTGGTGCAGCAGAGGTAGGTGAGCTGCCGTTGTGTCT  
CGGTGTACTGTTTATTAACCTTGTGCGTACTGGCATGACATGTAAAGAGAAAAGGGGGCCCGTGCCTT  
CCAGCCCAATGAATATGAGCGGGCTGATGACTGTTACTGTCAAACCAATACTTTTGTGCGGTGCTTCGC  
ACCTGGAAAACATGTGCGGTGTGTTTTCATGGGACGTCGCTGGATGTCTCGCTGCTCCTCGCTTTACCTCT  
CGGGGGGAGGGGAGGGGTGCAACTGCGGCGTGCCTGTGTGTGGTAGTGGTGTTCGCTTTTTGTTGCTTCT  
TTTTGGCGTAGTGCCGTTGTGTCGTCACGCGCCGCGACTCGGTGCTGCGGACGTCTTTTTTTTTTTCGTTTT  
CGTTGGTTTTCTTTGCTGTGCTGGCGTGTGTGGTACGTAGGCGTGCGGGCGCACGTCCGTGAGTTGTCCG  
GGACCGTTACCTTGATGGTGTGTTGATGTGCACATGTATGTGGTCTTGTGGCATGTGTGTGTGTGACT  
GCTGTTGGTGGGCTTGTGTTTGTGCTGGCGGTTTTCGTTCTGCTTTTGTCTCTCTCTCCGTCCGTG  
CGCTGAGTATGTGTGAGTGGGGCGAGCGAGAGTGGAAGTGAGAAGGCGAAAGCGATAAGCACCGGAGGCG  
TCCTGTTTCTCTGTCTGTCTGTCTGTCTGTCCATCTTTTTCGAATGCGCGTGCAGGTTTGGCCGACT  
TGGTGGTCTTTCCGTTTTTTCGATCCCAAATAACTACCGCAGAAAAGCACGAAAATGCGAGATTAGCGCAC  
GGTGTTCACATGGACAGCAAGTGAGGGACAAGCACAGACGCCGACGAGCGCTCCGGGGGAGCACCTCGTA  
TAAACTCATGCACGGCTGCACGATGAGTTTCGACGTGCTTGCACCCACCCACACTCGCCAACGCGGGCAG  
AGTGCTACTCGGTGTTTATGTGAGTCTACAGGCAAGATACTTCTCTCCACGGTTGCGCGTCTTTTTCCGC  
TTGTCTTGCCACGTTGAGTGCAGTGAAGGGGAAGAAGAGGCGCCGAAAAGTGAGTCGGAGCTGTGGCA  
GGCTCTGTTCCCTGTGAAAGCCTTCGACAGGAGTGAAGAAGGGGGGGGGGAATGATCGAGACAGAAGA  
CAAGACGGAACCGCGTGAGGAGGAGGAGTGCCTGAACCTACTCGCCGCCATTCGAATGGCACGCTGC  
AACAACCATCGGATCGCTCCTTTACCCCCCCCCCTCCCCCTCTCCGTCCTGTTCTACACGGCATT

TTCGCTATCGAGGAAGTCGGTCATGGCAAGCATTGCTTTTTCCGGTTCACCTACCC TTCACGGTGC  
CGCGCGGCACACACCGGTGCTCCCATGATCGGTTCAGAGCGACTGTGTACGCGAGCGGCCACGTATCACC  
ACCACCGCCTCTCCATTTTGACCTGCTATCTCTCGACTTGCCTTTTCTCTGTTTTTGCACACACAT  
GCCCATTTCCCTCCACACACCAACCGGGCCCTTCTCTCTCTCTCACGCACACACACACACACAC  
ACACACACACACACTTCCACACACTTCCAAACACACACACACACACACACTTCCACGCACACAC  
TTCCACACACAGCGGAGGGCGGGCGGACAGACAGTTCGCTGTTCTTCGCGCGTGCAGCGCTTTCTGCC  
TCGCCTCTTCCCTCTCTTACTGACGAGGGGACAAACATGTCGAGTCTTCGACGGCACCAATCAGGGG  
CAACAGCGAACCGACGCGCGCTTAGAGAGGTACATAAGAGGGCTGAATCGTCAGACACACCTACACGC  
ATCAAGGCGCTCCCTTTCCGAGCCATCACCTCACCTGCGCCAAACCTCTGCATCGCGCACGCGCTCTC  
TGTCTCTCGTACCGCGCTGAAATGTCGCGTGCCTGTTGTTTTGGCAGTTCATTGCTCGCGCAAGT  
TTGTGATGACAAGCACCCCGCCCTTCCCTTCTCCCTCACTCCAGGCCATACCCCTCGGTGCCCTCGG  
GTGTCTTTTTTTGTCCATGCATCCCTCTCTCTCTGTATTCCCTCTCTCTCTACGGACTCGGGCCCGCTC  
GCCTGTTTCGCAACATCTTCTCTCTCTCGCATTTTCGAGAGCAACGACACCCCTTCCCGGACCCACCC  
ACTCACTCCCGCCACACTTCTCTGTTGGCGAGTAAAGAAGACCAGACTCGGGTGCACACCGCCGC  
CTCTCTCTCACTCTCTTACTTGAACACGAACACAGAGTGCCTTCAAGCGGAGAACAGCAACAACA  
CGATGAACGCCATGTCGCGTTTTATGGTTCGGACTACCCGACGCGGACAACCCCGCTCATGTGGGAGGC  
GACACAGACGCTGCAGAGCTCTCTGGTTCGATCAGAGCAGTGACATGCGCCGCTCGCTGGACCTCGCCATG  
TCGCTGCACGAGGTGCTGGAGAGAAATCGAGAGATTTACAACAATATCATCGCCGAGCGCAACGAGGCC  
ACCGCCGCTGTCAGGACGCGGACGCGAAACTGCAGCAGTTCGAGCATGTCGTCGCGCCGCTACGCGGAGGT  
GAAGGATCCGGTGGTGGCCAGCGACGGCTACACGTAACGAGCGCACGGAGCTCAGCCGCTACCTTAGCGAC  
TGCAAGAAAGTCGAACAGCAAGGCCACTCTCGCAGCAGACCAAGGAGGAGCTGACAGACGTGATGGTAGACA  
ACGTTTTGCTGCGCCGGCTAGCGGAGCTGTTGAAGGGCGTGCACCTCGGTGGAGATGCCGAGCTGTGCGAG  
CCGCCCCGCTAGCGGGCGGTGTTGTCGACGTTAATGGCCCTCGCTCTCACGTTGGCCGAGGAGGATCCG  
TCAATGGGCGGCGGGATCACACTGAGATGGGTCCCGTCCCGTCCGCTCGCGGGCGGTGCGTGTGGCC  
GTGGTGGGAATGGGATGGCAGTGGGTCTCGGTACGCGCGCCCTCCGCTATGATCGGAGCGGAGGTGCCAA  
GTCCGGCAGGCGGACGCAACGGCAACGAGGGCAAGGGCGGGTGCATCCGTGCCGTATGGTTTTCT  
TGCAACTTCGAGGACGACTGCAGTTCGCAACTACCCCTACGAGGCATGCCGTAACCATATCAAGGCCA  
AGTGTGCTTCGCTCCACTGCAAGGAGCTGCACGTTGACCCGCGGACCCCGCTTACCAGAGCACACG  
CAGCTTTGCCAACCATCACACCAGGGCGGCAACAGCGCAACACCAACCACGTCACACAACCGCCGCT  
GCCTGTGCAAAACACCGCAACACCAGCCAGGCAACGGATGTCGGTTCGGGAGGCGCCGAGGCAGAGCGGGA  
GCAAGATGCCGACTCTGTAGCGGAACGGGAGACGGAGACTGCGGGCGGCAAGAGAGACGGCAAGTCGAA  
GGAGGCCGGGAGCCCGCTTCTGCTGCAGGTGCAGATGCCGCAAGGCCAAGGACGAATAAATCGGCGGC  
GGAATGGGCTTGTGCATGCGTGCCTGCGTGTGTGTGTGTGCCGTCTTCATATCTCCACCGACGTCTCCTC  
ACTTTTGCACGCTCGGCCCGCCCTCTCGCGGCACCCCTCTCCCTGCATGTCACATGCGTGTGTGGCGC  
TGCTAGCCTTCGCGGTAGCGGAAGGGATGAGGGGGGGGGCCCTCGCTGACATGACAACGGCAGAGCG  
GCAAGAGTGGACGAGGGCGCCCATTCGCTTTTGTTTTTTCTCTTCCGTTTTTACAGATGACGACACGCC  
ACGGGCTCTCTGTGCGCGGCACATGCCATGACGCGGCCCTTCGGCTGGTACACCGACTCCTGTGGG  
GGGCGTGCATTTCCGTAGAGGATGGTGTGTCCCTGCCGCCACAGACTCATGGCCGCGTTGCGCCTGTC  
GTGGCGCGTGCGGGCAAGCCCCGACAGCGCGCCCGGTGAAATGGACGGAATGGAGGATGAAGACAGCG  
AGCCCCGAGACAGCAACCGCTCCTAAAGCAGGCCCATGATCCGAAAACGTGAGCGCTGTGTGCACGC  
GCTCTCAAGCACAGGTGGCATGGTGTGTGTCGATTACGCAAGGCATCCAGAGGCCGGCAGAGCAAGAGTG  
ATGGACGGAGAAGGCGGGAAGGGATCCATGCAAAATGGCCCCCACCACACACACACACACACACA  
CAATGCATGCGTGCAGCATGTGCGGCATGCCCTCCATCTGACCGTGTGGGCTGGCGCGGCCCGCATGC  
GGAAAGCAGCCGAGAACACGCGAGTGCGCCATCGAGTCCCTCCGCGCTCGAATGTGGCGAGCCGCTGC  
AGAATCTTGTGGAATGCCGCGCTTGAAGCGACGGAGGGCAAGCATGGCATGCGGCCCGGGCACAGGGA  
CTCGGAGGCCCTGGCCCGCAGCTGGCCAGCTTCTGCTTGAAGCTCACCAGGCATGCACCTTGACCACCAC  
CTGTTATCCTCACAGCGGATGCCACCGTTTTCCGGCTGGGGCAGGACCCCTGGGCGCAACCCCTCTCGGATC  
AAGGCATGCCGCTCTCCCGCTCTCCGCTGGCGCTGATCGCGCAGCGCGTATCGGAGAAGGGGACGAGG  
AAGGGCGAGAAGAGTCCGTACGACGCACGGCCGATTCGACGGCAGGGACGGCTACGTCTGGTCCACCA  
GGAGGTAGCTGTGGTGCAGCAGAGGTAGGTGAGCTGCGGTTGTGTCTGCGTGTGTACGTTTATTAACCTG  
TGCGCGGAAGGTGTGAAAAATGCTTCTCAGCTCTTCTCATCTCGTTCATCTCGTTCATCTCTCTCT  
TCTCATCTCTTTGTTGATTGTGTTTTCCATCGGCTACTCTTGGCGTTTTTCGCGTGCAGTGTGTTTGT  
TTGTGCCGGCGTGTGTTGGACAGGAGGAGAAGACCGCCTGTGTGTTAGCCCCCTTCTCTTGGCTGCTA  
GAGTGTTCGAGATGCGGGCAGATGGTGGGAGCGACTGTGCGGGACGGCAAGCTCATGTTCTGGTTGA  
CGGTGTGGCGCTACTCTCTTTCGCTTCTCTGACGCGTGCGAATACTTTTTCTCAGCGTTGTTGATG  
Ggcagacgggtgcgcaaccgctgtggtcgttctctctagcatctgggtctctctaccgccaagtgatgcg  
ttcttgcagatgctgggtgttatcctcctgtgt

ccagataggcctgataataatggtgtcgtagtgatcttgcggaagttccacttcacctgccgcgacgt  
cgttggtgagatgaggtcgagaaggtagtaCAACCTCCAGTTGCGCTTGCCTGGCGGGTGGTTCGCAGCAC  
ATTTCGTCTCAATGAGCGAAACAGCTGACAGAGATACGACGTGCGGTACGCAAACATAACACTCAGACA  
ATACGCTCGCCCTCGGTGCGCTCAGCTCTCTTTCCAACAACGTTGAAGGAGTCCC'TCCACAAAG  
GGAGGAAGGAGTCAGTCACAGCGACGACAAAACAGCGAGACAAAAAAGGAAGGCTCCTGAAGGGAGAACG  
CAGCGAATGCTCTAGAAGAACCAGATTGGTTTCGTTGTTTTTTTTTTTTTCGTTTCGTGTGCGTGTGTGGGTG  
AGGGGTGGGGATGGGGGGGGGGATGTGGTTACAATGGAACCCAACGGCAACAACGTGCGGCGCACAGT  
GAAGTTGGAAACCTCTCCCGCTCCCAAACGAAAAGGAAACAGAAAAAGAAGACACGCACACACAAAAGGGC  
GGGGCAGGGGGGGAGGAAGGGGGGAAGGGGGGAAGGGGGAAAGGGGAAAGGCGAAATGCATAGAAAAGCGCCAACA  
AACCGGGAGGGAAGAGGGAGGCGGTGAGGCAGGGAAGTCCCCACCGGTGAGTGAAGCGAAGGAGGGA  
GTTGTGTGTGGGAAAAGATGATGCGCTTCGCGCGGAGATGTGAGACGGCAGTGAGCGCCGACAGCGGG  
GCAAGGAGAGGGTAGAGGAGAAGACAGGCGGCAACGGCGACAGTACTTTTTCTCGAGATCGTCTCTTAGGG  
TCTTTTAAAAAGCCGAAAACGAGCGTCGAGCACAAGAGGCACGTGAGTGTCTGTTCGTGCGCGGTGTGTTCG  
GCCTTTTCAGCTTCGCACGGCCGACGTGTCACCAAACAGCAATGACGGTAGCGTGCCGCACGCGGTGCCG  
CTGATGGAATTCGAAAAGGGCGGAAGCGCGGACCCACAGAGATGGTCCGCAAGGCACAAATGGAGGAAA  
AGAGCAACGATGATGTCAACGCCAGAGACTCGCGTGTGATCATGTATTTCTACTGTACGATTTTCAGGGAG  
CAAGATCGGTAGAACGTGCGAGAGAGGGAGAGAAAAGGGGGAGCGGCAACACTCACACGCGCATGAACTCG  
TCGACGAAGCCCCGGAACGTGCGTGTGTTGGGTAAAGTGGTTGAGGCGGGTTCGACGTGTGCACGTGT  
GTGAGACTGTCAGAACGTAAGAAGAGAAAAGTGGAGCAGAGAGGAAGAGGAGGTACACACATACACGCAC  
GCACATGCAAAACAGACAGGTAGAGGGGACGAGATTGTTTTACC GCGGGTGACAGAGGAGAAGCAGGTGAG  
CGTCACTGGCAACGTCATAGCGAGAGCGAGAGAAGGCGCATCAGCAGTAGGGGAGTGCACACTGCCG  
CGCCATTGCCGTGACCTTTTTTTTTTTTCGTTTTTTTCCGCACAACCGCCACAACAAAAC'TAGACGGTGA  
CGTCATGCATGGTGAAGTCAAGAATGGAGGTCACAGGACTGGAGGAGAGGGTGTGTGTGCGTGGGGAGGG  
GGGGGGGGGGCAGTGGCAGGAAGAGGAGATGGAAAGCCCCCTCTCAGTCTACACCTTCCCTCCACGCC  
CATCCGACCATGCACCTCTCGTTTCGCGCGGCCCGGTGCCAGAGGGGAGCGGTGTATGACACTGTAC  
AGGACGGTCAGCGGTGAGCTTTGTACTGTTCTCGTGCATGAGGATGCTTCCATGTCGTGCATCTTGGC  
CGACTGTAGAAAAGTAGTATTGCATCGTGCAGCGCAGTCCATACTCCAGCCGCGGGAAGAGGCGGGA  
AACGGGACATCCGCCGCGTGCCTCGCGCGCGAGTGTGGCACCGGAAGCAGGCACGGCATTAGCGCCAC  
TCGGCGCAGCTGTGCGAGAGTTGTTGGGAGGGCGCGCCGTGGCAGAGCCGGTGGGCTCTGTGACGAGGG  
CGCCGGTGAGCTGCCAAAAGACTCAGTGTGTTGGCATCGGCTGTCTCTCCAGGAAGcgaacgggg  
agattggaatgagagatggcctgctgccgcgccagccgagcactcgcgggcgtccgcaactgcaccacac  
cgtaccggaggccatccacag

>H130:LmjF.27:870624-871831

ctgccggggcactcgccgaccgctcgtggcccccgaaaaagcaccgcccacaccgacctggggcctccttcg  
gtgcgagcgaactacgcacatcgccccgctTCAAGCCTCGACCTTCACTGACCACGGGCTCGGCGTCTTG  
CCATACTGGATATCCGTTATCTCGTTCAGGAACCAGCGCGCTAGCTCGGCTCCGAGAGCGGCACGCTGT  
ACTCCTTGCCCGGATACCCAATCATGCTCACGGAAGACACAATGGCAGCCGTGCCGCATCCGAAGCACTC  
CATTACCGCCCCCTCTGCGAGCGCTCCACCAGCTCAGACATGTAGTATGGGCGCTCCGACACCTCGAAC  
TCGCCCCACGACCGTGCAAGCGCCAGGATCGAGTCGCGGTCACGCCGGCAGGATCGTCCCGTCCAGTG  
GCGCGGTGACCAGCTCTGTCTTGCCCTCCTTCGTTCTCCACAGCGTGCAGAAAGTTCATGAATCCGGCCTC  
CTGACCTCATCATTGGAGCCGAGCCACAACACCTGGTTGTAGCCGAGAGCCTGCGCCTCCTCTGAACC  
AGTAGCGGCCAGTAGTTGGCACCCAGCTTGCTGCCGCCAGTGCCACCGGGCCACGCGCGCTTGCGCT  
TATCCTCCCGCAGCAGCTCACGGGCTTGATGGCCATCGCACCCGACTGACCTTCCGCGCGCAGGTAGTA  
CGGCCCCACGGGCGAAGCAATCACGAAGAGACGCACCCGACTCGAGGGAGTGGCGCCAAGGCTATCTGCG  
GTGCCGATAGCAGCCGGACGCAGGTAAGCGAGTAGCCGTGCTCCTTAGGCACGTAATCCTTCTCCGTCC  
TCACGAACTCCGTGATCACCTTCAGCATCTCCGCCCTCGTCAAAGTCCGGGAAGCACAGAGAGCGCATGCT  
GTGGCGCAGGCGCGCAACGTTCCGGTCAGGGCGGAACAGGCGCAGGCTCTGCTTCTCCAGCTTCTCACCC  
CTCGCGCCCTCGTGATATCAGCAATGTCCGCGTACACCTTCATTCCTCAAAGCACTGTGTGCGGTAGT  
GCAGGCACGACGTCTGCGGCGGACGCAAAAAGTTGGCGAAAGGTACGATCGCCGGCGCACCCACCTGCC  
GTCGCTGAAGTCGATTATCACCATGTGCGGCGAAAAGAGGGTGCCAAAGGCGACGCCCTTCATCGGCGGC  
AGCGGGCGGCGGATCGGTACCAGTGTTTTAGTAAGCGCCGACGCCGTGAAGGAGACGACGGGGGCCCTG  
TGCCACGCGCAGCGCTGGCTGGTGCAGAGTCCGGCTCAGCAACATGGCAAGAAGTCTAGGGGGGGGCGC  
TGCCAGAGCAGAGGGGAAAAGACAGAGATGTGGACAGTGCATGCTGGGAGCGGGATGACTCAATCAACCA  
GAGCGGCGAGTGATGATGATATCGTTGGCTGTGAAGCTGGTGAACGACGACCAGTGCATGTGTGTGTG  
GTGTGCTTGGAGGATGGATGTACGATGATCTGTCCAACGGGAGACAAGGAGCGGTGCAGAAGCATAGCGA  
GGTAGGGAGGTCCGTAGCAGCAATGATGGAGAAGGAGAGGGACATGCAGCGAAAGAGAGCACGGTTCGAGA  
ATACGCATACGCACATACCCACACAGGATACCAGGCAGTCCGAGTGCAGCATGCCGCACCCCTGCAC  
CGCTGTAGACCGAAGCCGGCGACGAGGTTCCGTAGGCGAGCCAAATCGCACCCGCTTTCAACAAGCAGG  
GGGTGCACCGCACTGAAATGCACGTTCTCGTGGGCAAGATGGCGCGCTGTGTCCGTGTAAGGCAAGCG



GGGCGGGACATGGGAAGGCGGTGGCCGTTTCGCTCCTTGCCGCGCCTCTCCTGTGCTCCTTGTCTTTGCGG  
TTGGTGCTTCTGCTTTCGCTGTAGCCCGCGCCTCATCGCCCTCCCTCTCTCCGCGGGCAGGCGCGACTTC  
GCTTGCCTTTTGTGCGCTGATGCTGATGGCGTCCGTGAATGCAGCACTTCCATTCCGATTGCTGTGCGG  
CGAGAGACTCAGAAAGACAGGCAGCAAAAAGGAGAGAGAAAAGAGAGCGCCTAACAAACCGAAGCATGTGTGT  
GTGTGGTGTGTGTGTGTGTGTATGTGTGAAAGAGAAATGTAGATGATCGTCTTTTCGGCATGAGAGCTCCG  
GTGAGCGAAGAGGGCGCACACACATTCGCACGCACGTAAAGAGTCGCCTACGCAGAATGGCTGCAGCAGCC  
TCCTCCCTCCCCCCCCGTTTCACACACACACACACACACACACACACACCTGCGCACACACACACACCCGT  
ACTGCGTGCTGCTCTGGACCCTCGCACAGCTGAGCTCCAGGGGCGCAACAAGCACCCCGTGTGGGACTCC  
CTGCTGTCCCGTTCCTTTCGCACACAGAGAGAGACGTTCCCTTACACAAAGGTAAGCAAGGGGGTCCACT  
TGAGGTACGAATAAAAAGAAAAGAAAAGCAAAGTTCGGTTAGCGGAACGAAAAGAGAAGTTCGCGATCTCGCG  
CGAGAGAGAAAACCTGAAGTTACAGCATCGCTTCATCGGGGCGGTTCATCCTCGGTGCCGCGATCGCCG  
ACAAGAGCGAGAGGAAAAGACAAGAAATGACAAAACAAAAGGTTGTAGGTGAGTGAGGGATTAGCGTGTGT  
GAAAAGGGCGGCAAAAGGAGGCCAAGTCGGTTGGGGTTCGGGGGAAAAGAAGAGAGTGAACGATGGAGTGAA  
GTAGCCGGCGCGCTTCCACCTCGCCAGAACACCACCCACCGCCCTTCGCCTCGCTGAATCAGCACCACA  
ATGCCCGCGACATCACCATCAGCAGCGAGAGCAGCCGTATGCTCGTCGCGAGTTCGACGACGGAACAGT  
CGATGATGGCGGCGCCTGCCCTCCACTCCACGACCTGCCACTTCCGAGTGGGCGAAGAGGGCGGCGAGC  
CGGAGTAGAGATAGATATAGCAATATACCTATACAGAGGGAAAACGATACATAGAAAAGATCGTGCAGAG  
GGTCAATGAAAGTAGGTCACAACACAAAAAATGAACGCTTTTTTGGAGTGAGAGAAAAGCTCGGTGGTGG  
GGCAGACAGCGATGCCCGGAGGAGGAGGAGGAGGAGGAGGAGGAGGAGGAGGAGGAGGAGGAGGAGGAGGAGG  
AGGGAAAAGGAGGGAGGAGGAGAACGCCATGCGCCAGCACACACCGCGGGTCAAGCAAAAGGAGATGAACAC  
ACGTGCACGTGAGTCCACCGGAGTACACATTAGCCACTCGCACACACACACACACGCGCACACAACAAC  
AATTTTTTGGAAACATGAAAAAGAACGGAGCACGCGTGTGTGGTATGTGTGCGTTAAACAAGAACGAAAGAG  
AGGGGGAGGGCGCGGTTCAGGCAGGGGTTCCTCGGCGTTTACACACGTAACAACCTTTGACGAGCACCAGCA  
AATTTCCACACCCCTGCTCACCAGCGGGTACAAAACAACAACGATACCAAGAAAAAAAACGTGCACGCA  
CACACACCAGTAATAGCAATCGTGAAGACGGTTAGCGGGGAGGGGAAAAGACGATGATTTGTCGTGGTC  
ATGCTATCGAGGGGGGAGATCGCACACGATGGACGACACACCCACGTAACAACACGGAACCGGCGC  
GCGCATCTCATATTAGCTTCTCATCGTCTTAAGGATGTACACACGACGTCGTGCGACTCTCTGTATA  
ACTAGCAAGGCGCCCTGGCACTTGCCTGCCCTCCTTGCCACATCATCGCCACACCCGCCCTGGGCGTCT  
TCGGTGCGAGCGACTACGCACATCGGCCCGCTTCAAGCCTCGACCTTCACTGACCACGGGCTCGGCGT  
TTGCCATACTGGATATCCGTTATCTCGTTTCAGGAACCGGCGCGGTAGCTCGGCTCCGAGAGCGGCACGC  
TGTACTCCTTGC CGGATAACCAATCATGCTCACGGAAGACACAATGGCAGCCGTGCCGATCCGAAGCA  
CTCCATTACGCGCCCTCCTGCAGCGCTCCACCAGCTCAGACATGTAGTACGGGCGCTCCGACACCTCG  
AACTCGCCCACGACCGTGAAGCGCCAGGATCGAGTCGCGCGTCACGCCGGGAGGATCGTCCCGTCCA  
GTGGCGCGGTGACCAGCTCTGTCTTGCCCTCCTTCGCTTTCACAGCGTGCAGAAGTTCATGAATCCGGC  
CTCCTGCACCTCATCATTGGAGCCGAGCCACAACACCTGGTTGTAGCCGAGAGCCTGCGCCTCCTCCTGA  
ACCAGTAGCGGCCAGCGTAGTTGGCACCCAGCTTGTGCGCCAGTGCCACCGGGCCACGCGCGCTTGC  
GCTTATCCTCCGCCAGCAGCGTACGGGCTTGATGGCCATCGCACCCGACTGACCCCTCCGGCGGCAGGTA  
GTACGGCCCCACGGGCGAAGCAATCACGAAGAGACGCACCCGACCCGAGGGAGTGGCGCCAAGGCTATCT  
GCGGTGCCGATAGCAGCCGACGCAGGTAAGCGAGTAGCCGTGCTCCTTAGGCACGTAGTCTTCTCCG  
TCCTCACGAACTCCGTGATCACCTTCAGCATCTCCGCCCTCGTCAAAGTCCGGGAAGCACAGAGAGCGCAT  
GCTGTGGCGCAGGCGCAACGTTCCGGTCAGGGCGGAACAGGCGCAGGCTCTGCTTCTCCAGCTTCTCA  
CCCCTCGCGGCCCTCGTATGTAGCAATGTCCGCTACACCTTCAATCCCTCAAAGCACTGTGTGCGGT  
AGTGCAGGCACGACGCTGCGGCGGCAGCGAAAAGTTGGCGAAAAGGTACGATCGCCGGCGCACCCACCT  
GCCGTCGCTGAAGTCGATTATCACCATGTGCGGCGAAAAGAGGGTGCCAAAGGCGACGCCCTTTCATCGGC  
GGCAGCGGCGGCGGATCGGTACCCAGTGTTTTAGTAAGCGCCGACGCGTGAAGGAGACGACGGGGGCC  
TGCTGCCACGCGCAGCGCTGGCTGGTGCCAGAGTCGGCTCAGCAACATggcaagaagtctagggggg  
gctgccagagcagaggggaaaagacagagatgtggacagtcgatgctgggagcacagtgctgatgtttat  
gggagagtg
